# Supplementary material
Source: Elsevier journal article supplement (https://www.sciencedirect.com/science/article/pii/S0001731018303193)
Supplement: mmc1 [file S0001731018303193:mmc1.pdf]

## ANEXO I

Tabla 1. Preguntas de la encuesta. Se exponen los indicadores y su correspondiente pregunta.

| Melanoma                                                                                                                                                                  | Preguntas                                                                                                                                                                |
|---------------------------------------------------------------------------------------------------------------------------------------------------------------------------|--------------------------------------------------------------------------------------------------------------------------------------------------------------------------|
| El centro tiene una Unidad de Melanoma adscrita al Servicio de Dermatología coordinada o atendida por dermatólogos y que centraliza la atención de estos pacientes.       | ¿En su servicio, la atención al paciente con melanoma está centralizada en una Unidad de Melanoma adscrita al Servicio de Dermatología atendida por dermatólogos?        |
| El centro cuenta con circuitos específicos para el acceso directo e inmediato de los pacientes con lesiones sospechosas de melanoma                                       | ¿Cuenta su servicio con circuitos específicos para el acceso directo e inmediato de los pacientes con lesiones sospechosas de melanoma?                                  |
| El centro dispone de dermatoscopia digital para el seguimiento de pacientes con riesgo elevado de melanoma                                                                | ¿En su servicio dispone de dermatoscopia digital para el seguimiento de pacientes con riesgo elevado de melanoma?                                                        |
| El centro puede hacer fotografía corporal total de los pacientes con riesgo elevado de melanoma                                                                           | ¿Es factible en su servicio realizar a los pacientes con riesgo elevado de melanoma el seguimiento con la fotografía corporal total?                                     |
| Existe en el centro un Comité Multidisciplinar de Melanoma con participación del dermatólogo                                                                              | ¿Existe en el centro un Comité Multidisciplinar de Melanoma? ¿Participa el dermatólogo en el Comité Multidisciplinar de Melanoma?                                        |
| El centro dispone de un registro local de pacientes con melanoma                                                                                                          | ¿Dispone su servicio de un registro local de pacientes con melanoma?                                                                                                     |
| Existe un modelo estandarizado en el centro para el informe anatomopatológico de los casos de melanoma.                                                                   | ¿Existe en el centro un modelo estandarizado para la realización del informe anatomopatológico de melanoma?                                                              |
| En los casos de melanoma familiar, se tiene acceso en el centro a la realización de estudios genéticos                                                                    | ¿En los casos de melanoma familiar el dermatólogo tiene acceso en el centro a la realización de estudios genéticos?                                                      |
| Se tiene acceso en el centro al PET-TC para la estadificación inicial del paciente con melanoma con estadio IIC-III                                                       | ¿El dermatólogo tiene acceso en el centro al PET-TC para la estadificación inicial del paciente con melanoma con estadio IIC-III?                                        |
| Se tiene acceso en el centro a la Biopsia Selectiva del Ganglio Centinela en los casos con indicación electiva ( $\geq$ T1b)                                              | ¿En su centro tiene acceso a la Biopsia Selectiva del ganglio Centinela?                                                                                                 |
| Se tiene acceso en el centro a la disección ganglionar en los pacientes con metástasis ganglionares                                                                       | ¿Tiene acceso en el centro a la disección ganglionar en los pacientes con metástasis ganglionares?                                                                       |
| Se tiene acceso en el centro a terapias invasivas para el melanoma locorregionalmente avanzado - estadio IIIB-IIIC- (electroquimioterapia, perfusión del miembro aislado) | ¿Tiene acceso en el centro a terapias invasivas para el melanoma locorregionalmente avanzado - estadio IIIB-IIIC- (electroquimioterapia, perfusión del miembro aislado)? |

|                                                                                                                                                                                                                                                    |                                                                                                                                                                       |
|----------------------------------------------------------------------------------------------------------------------------------------------------------------------------------------------------------------------------------------------------|-----------------------------------------------------------------------------------------------------------------------------------------------------------------------|
| Se tiene acceso en el centro a las nuevas terapias para el melanoma metastásico                                                                                                                                                                    | ¿Tiene acceso en el centro a las nuevas terapias para el melanoma metastásico?                                                                                        |
| Se tiene acceso en el centro a la inclusión de pacientes con melanoma metastásico en ensayos clínicos. 2016                                                                                                                                        | ¿Tiene acceso en su centro a la inclusión de pacientes con melanoma metastásico en ensayos clínicos?                                                                  |
| Se tiene acceso en el centro a la realización de estudios moleculares (BRAF, c-KIT, etc) en pacientes con estadio III-IV                                                                                                                           | ¿Dispone en su centro estudios moleculares del tumor en pacientes con estadio III-IV(BRAF, c-KIT...)?                                                                 |
| Espinocelular                                                                                                                                                                                                                                      |                                                                                                                                                                       |
| El centro cuenta con circuitos específicos para el acceso directo de los pacientes con lesiones sospechosas de carcinoma espinocelular                                                                                                             | ¿El Servicio de Dermatología cuenta con un circuito de acceso específico para los pacientes con sospecha de carcinoma espinocelular?                                  |
| Existe en el centro un Comité Multidisciplinar de tumores de cabeza y cuello con participación del dermatólogo                                                                                                                                     | ¿Existe en su centro un Comité Multidisciplinar de tumores de cabeza y cuello? ¿Forma parte el dermatólogo del Comité Multidisciplinar de tumores de cabeza y cuello? |
| El informe anatomopatológico de los casos de carcinoma espinocelular se realiza en el centro siguiendo un modelo estandarizado                                                                                                                     | ¿Existe en su centro un modelo estandarizado para la realización del informe anatomopatológico del carcinoma espinocelular?                                           |
| El centro tiene acceso en el centro a la ecografía de las regiones ganglionares para la estadificación inicial del paciente con carcinoma espinocelular                                                                                            | ¿Dispone el centro de ecografía ganglionar para la estadificación del carcinoma espinocelular y/o carcinoma de células de Merkel?                                     |
| Se tiene acceso en el centro a la realización de TAC o RMN para el estudio de tumores de alto riesgo                                                                                                                                               | ¿El servicio de dermatología tiene acceso en el centro a TAC o RMN para el estudio de carcinoma espinocelular de alto riesgo?                                         |
| El servicio realiza el tratamiento quirúrgico del carcinoma espinocelular de alto riesgo, especialmente localizado en áreas en las que la aplicación de márgenes adecuados se asocia a secuelas funcionales, mediante cirugía micrográfica de Mohs | ¿Dispone en su centro de cirugía micrográfica de Mohs?                                                                                                                |
| Se tiene acceso en el centro a la realización de disección ganglionar en pacientes con metástasis ganglionares                                                                                                                                     | ¿Tiene acceso en el centro a la disección ganglionar en los pacientes con metástasis ganglionares?                                                                    |
| Se tiene acceso en el centro a radioterapia adyuvante para los casos de carcinoma espinocelular primario de alto riesgo y/o regiones ganglionares con alta carga tumoral                                                                           | ¿Dispone en su centro de radioterapia?                                                                                                                                |
| Se tiene acceso en el centro a la realización de radioterapia en pacientes con carcinoma espinocelular irresecable o en paciente inoperable                                                                                                        | ¿Dispone en su centro de radioterapia?                                                                                                                                |
| Se tiene acceso a electroquimioterapia y/o radioterapia para el tratamiento de las metástasis locales irresecables                                                                                                                                 | ¿El servicio de dermatología tiene acceso a electroquimioterapia para el tratamiento de las metástasis locales irresecables en el CEC/Merkel?                         |
| Se tiene acceso en el centro al tratamiento del dolor de los pacientes con carcinoma espinocelular avanzado no resecable                                                                                                                           | ¿Dispone en su centro de unidad del dolor? ¿Dispone en su centro de unidad de cuidados paliativos?                                                                    |
| Basocelular                                                                                                                                                                                                                                        |                                                                                                                                                                       |

|                                                                                                                                                                                                                |                                                                                                                                                                                  |
|----------------------------------------------------------------------------------------------------------------------------------------------------------------------------------------------------------------|----------------------------------------------------------------------------------------------------------------------------------------------------------------------------------|
| Se cuenta con circuitos específicos para el acceso directo de los pacientes con lesiones sospechosas de carcinoma basocelular                                                                                  | ¿El Servicio de Dermatología cuenta con un circuito de acceso específico para los pacientes con sospecha de carcinoma basocelular?                                               |
| El informe anatomopatológico de los casos de carcinoma basocelular se realiza en el centro siguiendo un modelo estandarizado                                                                                   | ¿Existe en su centro un modelo estandarizado para la realización del informe anatomopatológico del carcinoma basocelular?                                                        |
| Se realiza el tratamiento del carcinoma basocelular superficial con terapia fotodinámica                                                                                                                       | ¿Dispone en su servicio de terapia fotodinámica?                                                                                                                                 |
| Se realiza el tratamiento del carcinoma basocelular recidivante y de alto riesgo mediante cirugía micrográfica de Mohs                                                                                         | ¿Dispone en su centro de cirugía micrográfica de Mohs?                                                                                                                           |
| Se tiene acceso en el centro a la realización de radioterapia en pacientes con carcinoma basocelular irresecable o en paciente inoperable                                                                      | ¿Dispone en su centro de radioterapia?                                                                                                                                           |
| Se tiene acceso en el centro al tratamiento del dolor de los pacientes con carcinoma basocelular avanzado no resecables                                                                                        | ¿Dispone en su centro de unidad del dolor? ¿Dispone en su centro de unidad de cuidados paliativos?                                                                               |
| Merkel                                                                                                                                                                                                         |                                                                                                                                                                                  |
| Se tiene acceso en el centro a la realización de ecografía ganglionar para la estadificación del paciente con carcinoma de células de Merkel                                                                   | ¿Dispone el centro de ecografía ganglionar para la estadificación del carcinoma espinocelular y/o carcinoma de células de Merkel?                                                |
| Se tiene acceso en el centro a la realización de PET-TC para la estadificación del paciente con carcinoma de células de Merkel                                                                                 | Disponer de PET-TC se responde en la pregunta: ¿El dermatólogo tiene acceso en el centro al PET-TC para la estadificación inicial del paciente con melanoma con estadio IIC-III? |
| Se tiene acceso en el centro a la realización de Biopsia Selectiva del Ganglio Centinela en pacientes con carcinoma de células de Merkel sin enfermedad ganglionar regional clínicamente evidente (N0)         | ¿En su centro tiene acceso a la Biopsia Selectiva del ganglio Centinela?                                                                                                         |
| Se tiene acceso en el centro a la realización de disección en pacientes con metástasis ganglionares                                                                                                            | ¿Tiene acceso en el centro a la disección ganglionar en los pacientes con metástasis ganglionares?                                                                               |
| Se tiene acceso en el centro a la realización de radioterapia en los pacientes con carcinoma de células de Merkel con afectación ganglionar consistente en metástasis múltiples o con afectación extracapsular | ¿Dispone en su centro de radioterapia?                                                                                                                                           |
| Se tiene acceso a electroquimioterapia y/o radioterapia para el tratamiento de las metástasis locales irresecables (satelitis y/o tránsitos) de los pacientes con carcinoma de células de Merkel               | ¿El servicio de dermatología tiene acceso a electroquimioterapia para el tratamiento de las metástasis locales irresecables en el CEC/Merkel?                                    |
| Se tiene acceso en el centro al tratamiento del dolor de los pacientes con carcinoma de células de Merkel avanzado no resecable                                                                                | ¿Dispone en su centro de unidad del dolor? ¿Dispone en su centro de unidad de cuidados paliativos?                                                                               |

**Tabla 2.** Indicadores que no fueron preguntados en la encuesta

| Indicadores que no fueron preguntados en la encuesta                                                                                                                                                                                                                                                                                                                                                                                                                                                                                                                                                                                                                                                                                                                                                                                                                                                                                                                                                                                                                                                                                                                                      |
|-------------------------------------------------------------------------------------------------------------------------------------------------------------------------------------------------------------------------------------------------------------------------------------------------------------------------------------------------------------------------------------------------------------------------------------------------------------------------------------------------------------------------------------------------------------------------------------------------------------------------------------------------------------------------------------------------------------------------------------------------------------------------------------------------------------------------------------------------------------------------------------------------------------------------------------------------------------------------------------------------------------------------------------------------------------------------------------------------------------------------------------------------------------------------------------------|
| <ul style="list-style-type: none"><li>• El dermatólogo es el responsable del seguimiento del paciente con melanoma en estadios I-II</li><li>• El dermatólogo es el responsable del seguimiento del paciente con melanoma en estadios I-III</li><li>• El dermatólogo es el responsable del seguimiento del paciente con melanoma en estadios I-IV</li><li>• El centro realiza ecografía ganglionar durante el seguimiento del paciente con melanoma estadio IIB-III</li><li>• Se realiza el tratamiento quirúrgico del carcinoma basocelular mediante la exéresis quirúrgica y reconstrucción</li><li>• Se realiza el tratamiento del carcinoma basocelular irresecable y/o metastásico con inhibidores sistémicos de la vía hedgehog</li><li>• El servicio realiza el tratamiento quirúrgico del carcinoma espinocelular mediante la exéresis quirúrgica y reconstrucción</li><li>• El servicio realiza el tratamiento quirúrgico del carcinoma de células de Merkel mediante la exéresis quirúrgica y reconstrucción</li><li>• Se realiza en el centro el tratamiento quirúrgico de las recidivas locales, satelitosis y tróncos resecables del carcinoma de células de Merkel</li></ul> |

**Tabla 3.** Indicadores formulados como dos preguntas. Se expone el indicador y las dos preguntas asociadas.

|                                                                                                                                 |                                                                                                                                                                       |
|---------------------------------------------------------------------------------------------------------------------------------|-----------------------------------------------------------------------------------------------------------------------------------------------------------------------|
| Se tiene acceso en el centro al tratamiento del dolor de los pacientes con carcinoma de células de Merkel avanzado no resecable | ¿Dispone en su centro de unidad del dolor? ¿Dispone en su centro de unidad de cuidados paliativos?                                                                    |
| Existe en el centro un Comité Multidisciplinar de tumores de cabeza y cuello con participación del dermatólogo                  | ¿Existe en su centro un Comité Multidisciplinar de tumores de cabeza y cuello? ¿Forma parte el dermatólogo del Comité Multidisciplinar de tumores de cabeza y cuello? |
| Existe en el centro un Comité Multidisciplinar de Melanoma con participación del dermatólogo                                    | ¿Existe en el centro un Comité Multidisciplinar de Melanoma? ¿Participa el dermatólogo en el Comité Multidisciplinar de Melanoma?                                     |
